# Supplementary material
Source: MDPI journal article supplement (https://www.mdpi.com/2311-7524/10/4/373)
Supplement: s1 [file s1]

[illegible]



C

*F. oxysporum*

*F. fujikuroi*  
(*F. acutatum*)

*Neocosmospora*  
(*F. solani*)

*F. oxysporum*

*F. fujikuroi*  
(*F. acutatum*)

*Neocosmospora*  
(*F. solani*)

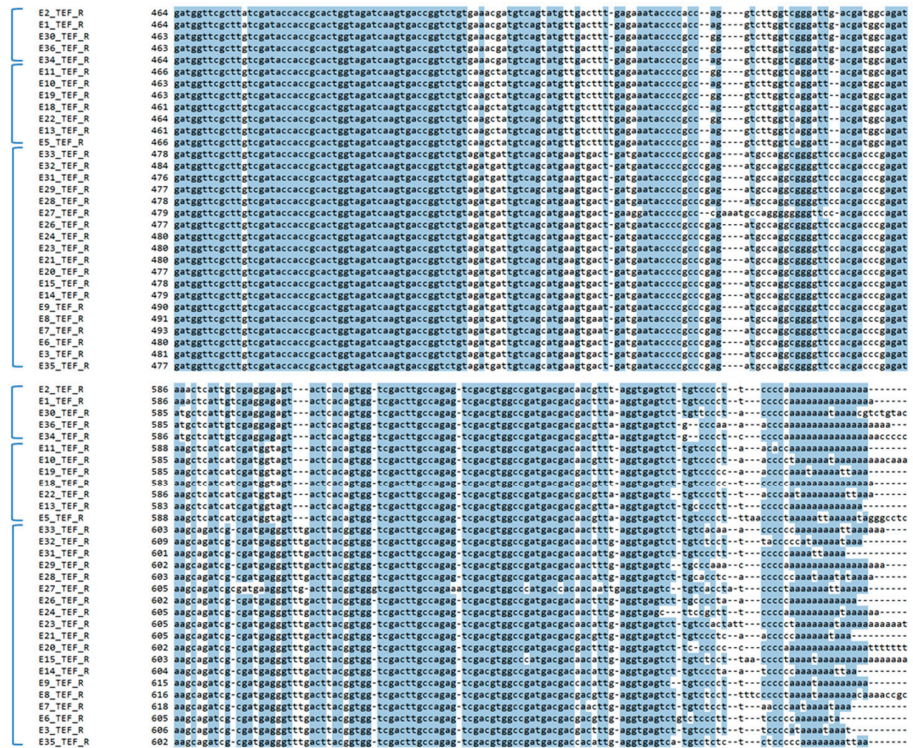

**Figure S1.** Sequences alignment of the TEF1 gene of the *Fusarium* isolates (presented in Table 2). The sequences were aligned using the Clone Manager 11.0 program (Sci Ed Software, Durham, NC, USA) and divided into three parts (**A-C**) to simplify the presentation. Color areas of high matches (similarity) at the same base position are highlighted in blue.
