# Supplementary material
Source: MDPI journal article supplement (https://www.mdpi.com/2311-7524/10/4/373)
Supplement: s1 [file s1]

**Table S2.** Seed germination in the seedling pathogenicity assay for *Neocosmospora* (*F. solani*) isolates.

| Collection Site *            | Isolate                 | Orlando cv.    |                   | Noam cv.       |                   |
|------------------------------|-------------------------|----------------|-------------------|----------------|-------------------|
|                              |                         | Germination    | Control           | Germination    | Control           |
|                              |                         | (% $\pm$ S.E.) | difference<br>(%) | (% $\pm$ S.E.) | difference<br>(%) |
| Givat Yoav,<br>Golan Heights | E3                      | 100 $\pm$ 0    | 106               | 93 $\pm$ 8     | 103               |
|                              | E7                      | 100 $\pm$ 0    | 106               | 97 $\pm$ 3     | 107               |
|                              | E8                      | 95 $\pm$ 3     | 101               | 88 $\pm$ 5     | 97                |
|                              | E9                      | 93 $\pm$ 5     | 98                | 90 $\pm$ 4     | 100               |
| Yiron,                       | E14                     | 98 $\pm$ 3     | 103               | 85 $\pm$ 3     | 94                |
| Galilee                      | E21                     | 100 $\pm$ 0    | 106               | 93 $\pm$ 3     | 103               |
| Controls                     | <i>F. acutatum</i> (B5) | 83 $\pm$ 10    | 88                | 95 $\pm$ 3     | 106               |
|                              | Non-infected            | 94 $\pm$ 4     | -                 | 90 $\pm$ 4     | -                 |

\* Isolates' colonies were collected from onions originating from Givat Yoav (Golan Heights) and Kibbutz Yiron (Galilee, Hula Valley) fields (see Figure 1).
