# Supplementary material
Source: MDPI journal article supplement (https://www.mdpi.com/2311-7524/10/4/373)
Supplement: s1 [file s1 › Figure S2.pdf]

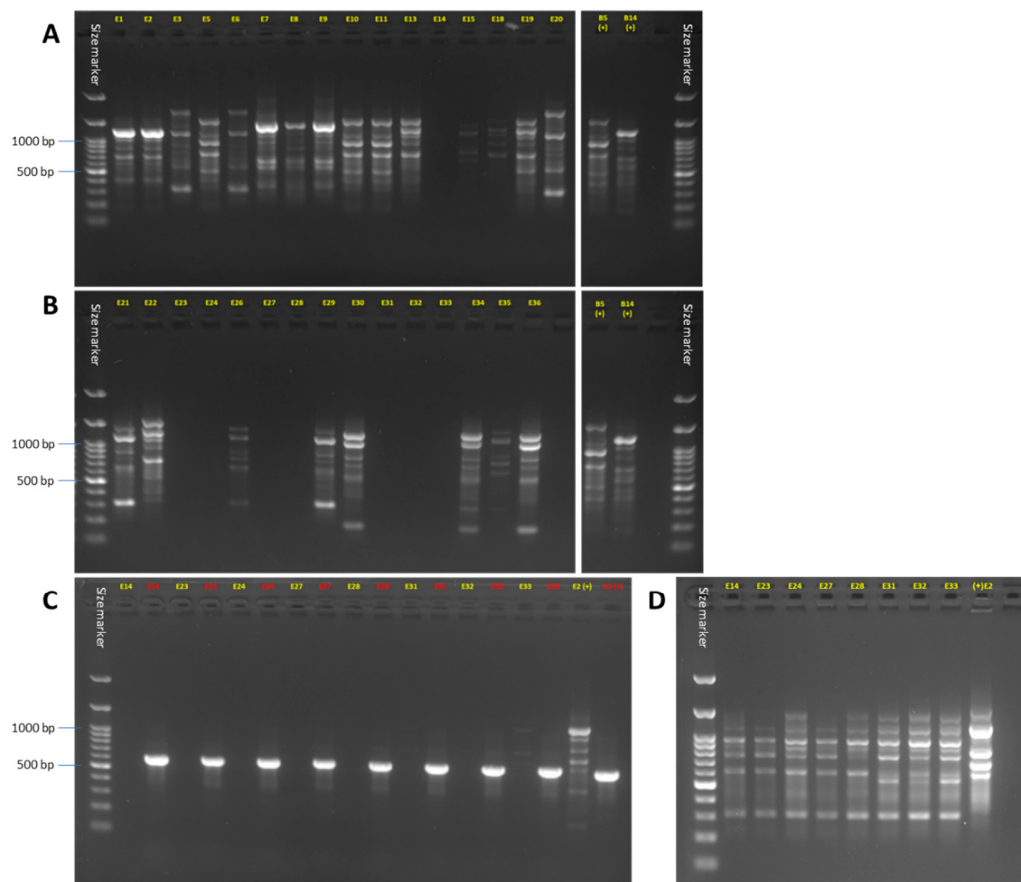

**Figure S2.** Full-length gels for the *Fusarium* isolates' DNA fingerprinting which are shown in Figure 7. **A, B.** The complex band profile was generated using the inter simple sequence repeat (ISSR)-PCR molecular method. The ISSR primers are listed in Table 1. The PCR reaction for ISSR amplification was conducted with the following parameters: an initial denaturation step at 95°C for 2 minutes; followed by 40 cycles of denaturation at 95°C for 15 seconds, annealing at 50°C for 15 seconds, and extension at 72°C for 30 seconds. The *F. acutatum* (isolate B15) and the *F. oxysporum* f. sp. *cepae* (isolate B14) were used as a positive control. **C.** The same PCR reaction conditions as in A and B to the undetected PCR products, with the addition of positive control, the universal internal transcribed spacer (ITS, highlighted in red) gene product (according to Kalman et al. 2020). Isolate E2 (*F. oxysporum* f. sp. *cepae*) was another positive

control. **D.** A molecular PCR repetition to the undetected products in A and B, with the following changes: annealing at 43°C and the DNA template was diluted x2.
