# Supplementary material
Source: MDPI journal article supplement (https://www.mdpi.com/2311-7524/10/4/373)
Supplement: s1 [file s1 › Table S1.pdf]

**Table S1.** NCBI BLASTN identification of the *Fusarium* isolates from this study. <sup>a</sup>

| Isolate         | Primer   | <i>Fusarium</i> spp.                                 | Gene   | Accession                                                | Similarity       | Overlap    | Onion cv. | Collection site <sup>c</sup> |
|-----------------|----------|------------------------------------------------------|--------|----------------------------------------------------------|------------------|------------|-----------|------------------------------|
| E1 <sup>b</sup> | E1/E2    | <i>Fusarium oxysporum</i> f. sp. <i>cepae</i>        | TEF1/2 | <a href="#">MH161450.1</a>                               | 99.85%           | 95%        | Ha2       | Givat Yoav, Golan Heights    |
|                 | 7cf/11ar | <i>Fusarium oxysporum</i> f. sp. <i>cumini</i>       | RPB2   | <a href="#">LT841210.1</a>                               | 99.08%           | 98%        |           |                              |
| E2 <sup>b</sup> | E1/E2    | <i>Fusarium oxysporum</i> f. sp. <i>cepae</i>        | TEF1/2 | <a href="#">MH161450.1</a>                               | 99.70%           | 95%        | Ha2       | Givat Yoav, Golan Heights    |
|                 | 7cf/11ar | <i>Fusarium oxysporum</i> f. sp. <i>cumini</i>       | RPB2   | <a href="#">LT841210.1</a>                               | 99.37%           | 98%        |           |                              |
| E3              | E1/E2    | <i>Fusarium falciforme</i><br><i>Fusarium solani</i> | TEF1/2 | <a href="#">OQ122079.1</a><br><a href="#">HE647917.1</a> | 99.86%<br>99.71% | 94%<br>95% | Ha1       | Givat Yoav, Golan Heights    |
|                 | 7cf/11ar | <i>Fusarium falciforme</i>                           | RPB2   | <a href="#">OP913396.1</a>                               | 97.86%           | 79%        |           |                              |
| E5              | E1/E2    | <i>Fusarium acutatum</i>                             | TEF1/2 | <a href="#">OL631172.1</a>                               | 99.70%           | 98%        | Ha1       | Givat Yoav, Golan Heights    |
|                 | 7cf/11ar | <i>Fusarium acutatum</i>                             | RPB2   | <a href="#">MN193883.1</a>                               | 98.94%           | 98%        |           |                              |
| E6              | E1/E2    | <i>Fusarium falciforme</i><br><i>Fusarium solani</i> | TEF1/2 | <a href="#">OL655000.1</a><br><a href="#">HQ731052.1</a> | 99.43%<br>99.57% | 96%        | Ha1       | Givat Yoav, Golan Heights    |
|                 | Fa/R8    | <i>Fusarium solani</i>                               | RPB1   | <a href="#">MW377534.1</a>                               | 92.01%           | 50%        |           |                              |
| E7              | E1/E2    | <i>Fusarium solani</i>                               | TEF1/2 | <a href="#">MN329690.1</a>                               | 99.29%           | 97%        | Ha1       | Givat Yoav, Golan Heights    |
|                 | 7cf/11ar | <i>Fusarium solani</i>                               | RPB2   | <a href="#">XM_046273849.1</a>                           | 98.11%           | 98%        |           |                              |
| E8              | E1/E2    | <i>Fusarium solani</i>                               | TEF1/2 | <a href="#">MN329690.1</a>                               | 99.86%           | 97%        | Ha2       | Givat Yoav, Golan Heights    |
|                 | Fa/R8    | <i>Fusarium solani</i>                               | RPB1   | <a href="#">XM_046270542.1</a>                           | 97.80%           | 98%        |           |                              |
| E9              | E1/E2    | <i>Fusarium solani</i>                               | TEF1/2 | <a href="#">OP661104.1</a>                               | 99.71%           | 96%        | Ha2       | Givat Yoav, Golan Heights    |
|                 | 7cf/11ar | <i>Fusarium solani</i>                               | RPB2   | <a href="#">XM_046273849.1</a>                           | 99.66%           | 91%        |           |                              |
| E10             | E1/E2    | <i>Fusarium acutatum</i>                             | TEF1/2 | <a href="#">OL631172.1</a>                               | 99.55%           | 85%        | Ha1       | Givat Yoav, Golan Heights    |
|                 | 7cf/11ar | <i>Fusarium acutatum</i>                             | RPB2   | <a href="#">MN193883.1</a>                               | 98.31%           | 98%        |           |                              |
| E11             | E1/E2    | <i>Fusarium acutatum</i>                             | TEF1/2 | <a href="#">OL631172.1</a>                               | 99.70%           | 97%        | Ha1       | Givat Yoav, Golan Heights    |
|                 | 7cf/11ar | <i>Fusarium acutatum</i>                             | RPB2   | <a href="#">MN193883.1</a>                               | 99.05%           | 97%        |           |                              |
| E13             | E1/E2    | <i>Fusarium acutatum</i>                             | TEF1/2 | <a href="#">MT010989.1</a>                               | 99.70%           | 99%        | Orlando   | Yiron, Galilee               |
|                 | 7cf/11ar | <i>Fusarium acutatum</i>                             | RPB2   | <a href="#">MN193883.1</a>                               | 99.79%           | 98%        |           |                              |

|     |          |                                                      |        |                                                          |                  |            |             |                   |
|-----|----------|------------------------------------------------------|--------|----------------------------------------------------------|------------------|------------|-------------|-------------------|
| E14 | E1/E2    | <i>Fusarium solani</i><br><i>Fusarium falciforme</i> | TEF1/2 | <a href="#">MW451301.1</a><br><a href="#">KF020508.1</a> | 99.71%<br>99.42% | 96%<br>97% | Orland<br>o | Yiron,<br>Galilee |
|     | 7cf/11ar | <i>Fusarium falciforme</i><br><i>Fusarium solani</i> | RPB2   | <a href="#">OP913396.1</a><br><a href="#">MF276968.1</a> | 93.48%<br>96.39% | 97%<br>86% |             |                   |
| E15 | E1/E2    | <i>Fusarium solani</i><br><i>Fusarium falciforme</i> | TEF1/2 | <a href="#">KY486693.1</a><br><a href="#">ON375423.1</a> | 99.13%           | 97%        | Orland<br>o | Yiron,<br>Galilee |
|     | 7cf/11ar | <i>Fusarium falciforme</i>                           | RPB2   | <a href="#">OP913396.1</a>                               | 93.96%           | 98%        |             |                   |
| E18 | E1/E2    | <i>Fusarium acutatum</i>                             | TEF1/2 | <a href="#">MT010989.1</a>                               | 99.64%           | 84%        | Orland<br>o | Yiron,<br>Galilee |
|     | Fa/R8    | <i>Fusarium acutatum</i>                             | RPB1   | <a href="#">MN193911.1</a>                               | 99.16%           | 98%        |             |                   |
| E19 | E1/E2    | <i>Fusarium acutatum</i>                             | TEF1/2 | <a href="#">MT010989.1</a>                               | 99.70%           | 97%        | Orland<br>o | Yiron,<br>Galilee |
|     | 7cf/11ar | <i>Fusarium acutatum</i>                             | RPB2   | <a href="#">MN193883.1</a>                               | 99.79%           | 97%        |             |                   |
| E20 | E1/E2    | <i>Fusarium solani</i><br><i>Fusarium falciforme</i> | TEF1/2 | <a href="#">KY486693.1</a><br><a href="#">ON375423.1</a> | 99.42%           | 97%        | Orland<br>o | Yiron,<br>Galilee |
|     | 7cf/11ar | <i>Fusarium falciforme</i>                           | RPB2   | <a href="#">OP913396.1</a>                               | 98.72%           | 98%        |             |                   |
| E21 | E1/E2    | <i>Fusarium solani</i><br><i>Fusarium falciforme</i> | TEF1/2 | <a href="#">MN386753.1</a><br><a href="#">MG272423.1</a> | 99.42%           | 98%        | Orland<br>o | Yiron,<br>Galilee |
|     | 7cf/11ar | <i>Fusarium falciforme</i>                           | RPB2   | <a href="#">OP913396.1</a>                               | 97.03%           | 97%        |             |                   |
| E22 | E1/E2    | <i>Fusarium acutatum</i>                             | TEF1/2 | <a href="#">MT010989.1</a>                               | 99.85%           | 97%        | Orland<br>o | Yiron,<br>Galilee |
|     | 7cf/11ar | <i>Fusarium acutatum</i>                             | RPB2   | <a href="#">MN193883.1</a>                               | 99.58%           | 99%        |             |                   |
| E23 | E1/E2    | <i>Fusarium solani</i><br><i>Fusarium falciforme</i> | TEF1/2 | <a href="#">MW451301.1</a><br><a href="#">MG272423.1</a> | 99.12%<br>98.69% | 96%<br>97% | Orland<br>o | Yiron,<br>Galilee |
|     | 7cf/11ar | <i>Fusarium falciforme</i>                           | RPB2   | <a href="#">OP913396.1</a>                               | 96.76%           | 96%        |             |                   |
| E24 | E1/E2    | <i>Fusarium solani</i><br><i>Fusarium falciforme</i> | TEF1/2 | <a href="#">MW451301.1</a><br><a href="#">MH179128.1</a> | 99.56%<br>99.27% | 96%<br>97% | Orland<br>o | Yiron,<br>Galilee |
|     | 7cf/11ar | <i>Fusarium falciforme</i>                           | RPB2   | <a href="#">OP913396.1</a>                               | 98.52%           | 96%        |             |                   |
| E26 | E1/E2    | <i>Fusarium solani</i><br><i>Fusarium falciforme</i> | TEF1/2 | <a href="#">MW451301.1</a><br><a href="#">MH179128.1</a> | 99.71%<br>99.27% | 96%<br>97% | Orland<br>o | Yiron,<br>Galilee |
|     | 7cf/11ar | <i>Fusarium falciforme</i>                           | RPB2   | <a href="#">OP913396.1</a>                               | 99.25%           | 97%        |             |                   |
| E27 | E1/E2    | <i>Fusarium solani</i><br><i>Fusarium falciforme</i> | TEF1/2 | <a href="#">MW451301.1</a><br><a href="#">MG272423.1</a> | 99.56%<br>98.98% | 96%<br>97% | Orland<br>o | Yiron,<br>Galilee |
|     | 7cf/11ar | <i>Fusarium falciforme</i>                           | RPB2   | <a href="#">OP913396.1</a>                               | 89.51%           | 97%        |             |                   |
| E28 | E1/E2    | <i>Fusarium solani</i><br><i>Fusarium falciforme</i> | TEF1/2 | <a href="#">MW451301.1</a><br><a href="#">MG272423.1</a> | 99.41%<br>99.12% | 94%        | Orland<br>o | Yiron,<br>Galilee |
|     | 7cf/11ar | <i>Fusarium falciforme</i>                           | RPB2   | <a href="#">OP913396.1</a>                               | 90.68%           | 96%        |             |                   |

|     |          |                                                      |        |                                                          |        |     |         |                   |
|-----|----------|------------------------------------------------------|--------|----------------------------------------------------------|--------|-----|---------|-------------------|
| E29 | E1/E2    | <i>Fusarium solani</i><br><i>Fusarium falciforme</i> | TEF1/2 | <a href="#">KY486693.1</a><br><a href="#">ON375423.1</a> | 99.71% | 97% | Orlando | Yiron,<br>Galilee |
|     | 7cf/11ar | <i>Fusarium falciforme</i>                           | RPB2   | <a href="#">OP913396.1</a>                               | 98.83% | 96% |         |                   |
| E30 | E1/E2    | <i>Fusarium oxysporum</i><br><i>f. sp. asparagi</i>  | TEF1/2 | <a href="#">MT305183.1</a>                               | 99.41% | 82% | Orlando | Yiron,<br>Galilee |
|     | 7cf/11ar | <i>Fusarium oxysporum</i><br><i>f. sp. dianthi</i>   | RPB2   | <a href="#">LT841238.1</a>                               | 99.58% | 98% |         |                   |
| E31 | E1/E2    | <i>Fusarium solani</i><br><i>Fusarium falciforme</i> | TEF1/2 | <a href="#">KY486693.1</a><br><a href="#">ON375423.1</a> | 98.98% | 83% | Orlando | Yiron,<br>Galilee |
|     | 7cf/11ar | <i>Fusarium falciforme</i>                           | RPB2   | <a href="#">OP913396.1</a>                               | 88.59% | 97% |         |                   |
| E32 | E1/E2    | <i>Fusarium falciforme</i>                           | TEF1/2 | <a href="#">OR167582.1</a>                               | 99.56% | 97% | Orlando | Yiron,<br>Galilee |
|     | 7cf/11ar | <i>Fusarium falciforme</i>                           | RPB2   | <a href="#">OP913396.1</a>                               | 92.37% | 97% |         |                   |
| E33 | E1/E2    | <i>Fusarium solani</i>                               | TEF1/2 | <a href="#">KY486693.1</a>                               | 99.56% | 97% | Orlando | Yiron,<br>Galilee |
|     | 7cf/11ar | <i>Fusarium falciforme</i>                           | RPB2   | <a href="#">OP913396.1</a>                               | 94.82% | 97% |         |                   |
| E34 | E1/E2    | <i>Fusarium oxysporum</i>                            | TEF1/2 | <a href="#">MN223435.1</a>                               | 99.10% | 97% | Orlando | Yiron,<br>Galilee |
|     | 7cf/11ar | <i>Fusarium oxysporum</i>                            | RPB2   | <a href="#">LT841238.1</a>                               | 99.68% | 97% |         |                   |
| E35 | E1/E2    | <i>Fusarium solani</i><br><i>Fusarium falciforme</i> | TEF1/2 | <a href="#">KY486693.1</a><br><a href="#">ON375423.1</a> | 99.13% | 97% | Orlando | Yiron,<br>Galilee |
|     | 7cf/11ar | <i>Fusarium falciforme</i>                           | RPB2   | <a href="#">OP913396.1</a>                               | 95.47% | 97% |         |                   |
| E36 | E1/E2    | <i>Fusarium oxysporum</i>                            | TEF1/2 | <a href="#">MN223435.1</a>                               | 99.25% | 97% | Orlando | Yiron,<br>Galilee |
|     | 7cf/11ar | <i>Fusarium oxysporum</i><br><i>f. sp. dianthi</i>   | RPB2   | <a href="#">LT841238.1</a>                               | 99.68% | 99% |         |                   |

<sup>a</sup> Identifying the isolates relies on the highest sequence similarity scores of the studied genomic regions. PCR confirmed all isolates' identities with E1/E2 primers (targeting the *Fusarium* translation elongation factor-1 alpha gene) or the Fa/R8 or 7cF/11aR primers (targeting the RPB1 or RPB2 – the RNA polymerase largest or 2<sup>nd</sup> largest subunit, Table 1). Data generated by DNA sequencing were deposited in the NCBI repository. GenBank accession numbers for the nucleotide TEF1/2 sequences are presented in the declarations section, "Data Availability Statement."

<sup>b</sup> Isolates E1 and E2 were also identified using the FOC-six3 primers (targeting the *F. oxysporum* f. sp. *cepae* secreted in xylem genes 3, Figure 4).

<sup>c</sup> Isolates' colonies were collected from onions originating from Givat Yoav (Golan Heights) and Kibbutz Yiron (Galilee, Hula Valley) fields (see Figure 1).
